# Supplementary material for: Exosomal S100A9 Promotes Lung Metastasis of Adenoid Cystic Carcinoma via Activating Cancer-Associated Fibroblasts
Source: Research Square preprint supplement (doi:10.21203/rs.3.rs-7171055/v1), 2025-10-05

Figure 1 C

S100A9

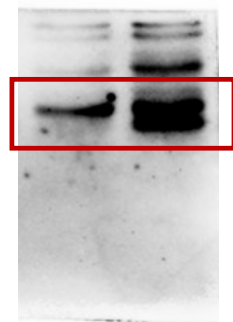

S100A9

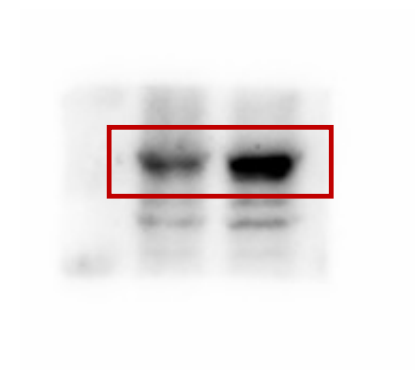

$\beta$ -actin

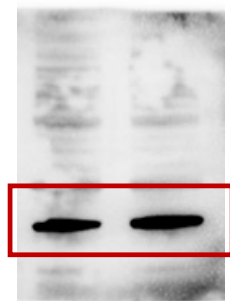

HSP70

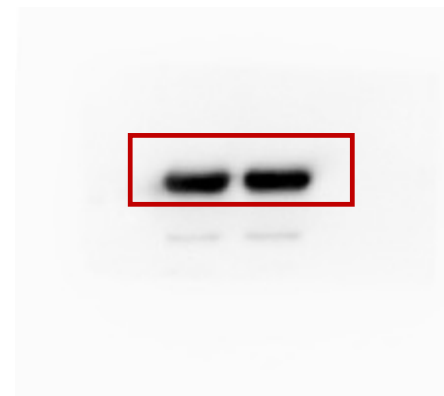

# Figure 4 I

Cytoplasm

p65

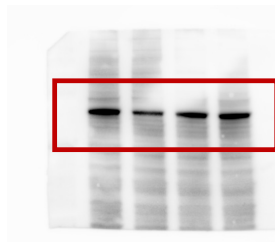

p-p65

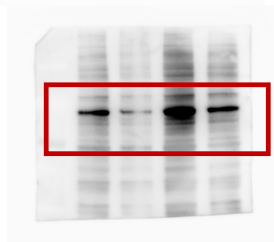

$\beta$ -actin

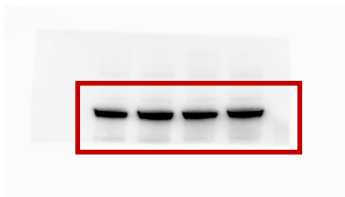

Nucleus

p-p65

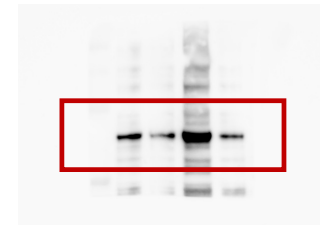

Histone H3

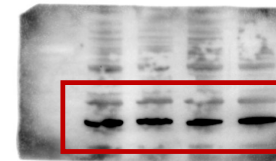

# Figure 5 L

N-cadherin

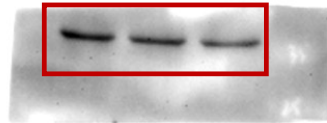

E-cadherin

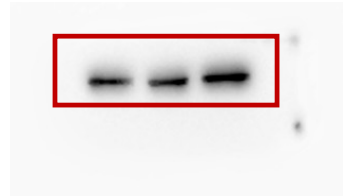

GAPDH

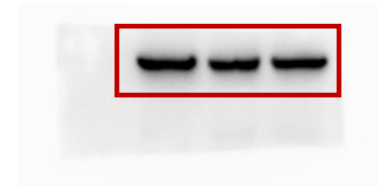

MMP9

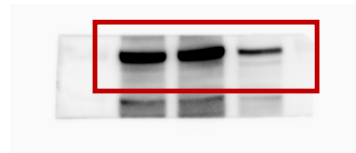

MMP2

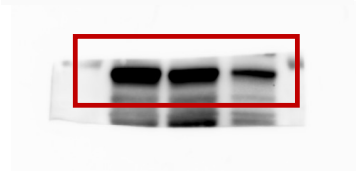

# Figure 5 M

N-cadherin

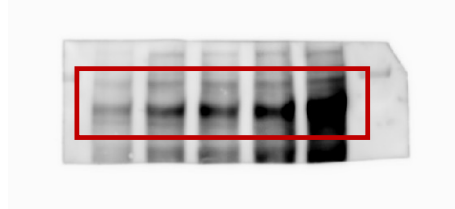

MMP9

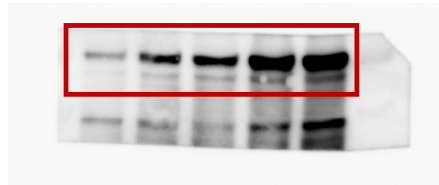

Snail

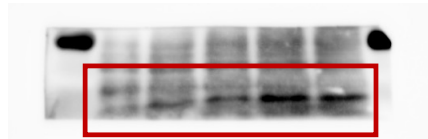

GAPDH

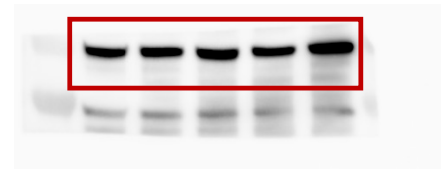

E-cadherin

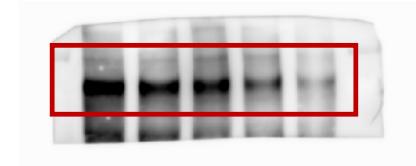

MMP2

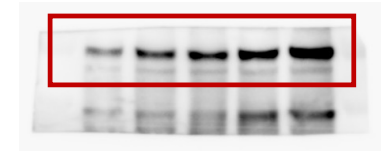

Slug

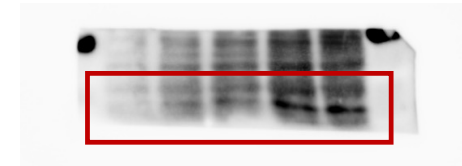

GAPDH

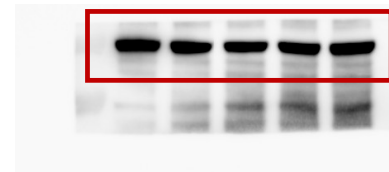

## Figure Supplementary 1 C

HSP70

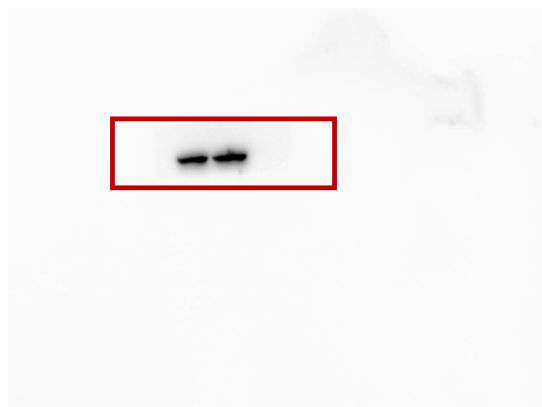

TSG101

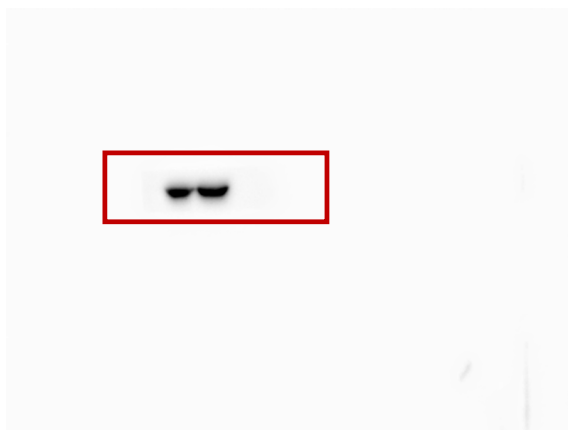

CD63

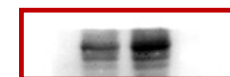

CD9

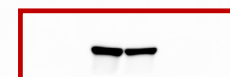

CD81

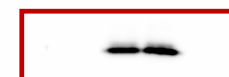

## Figure Supplementary 5 B

FAP

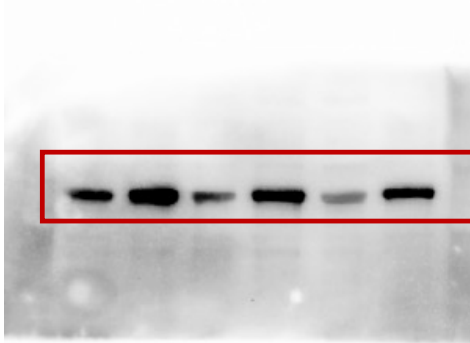

$\alpha$ -SMA

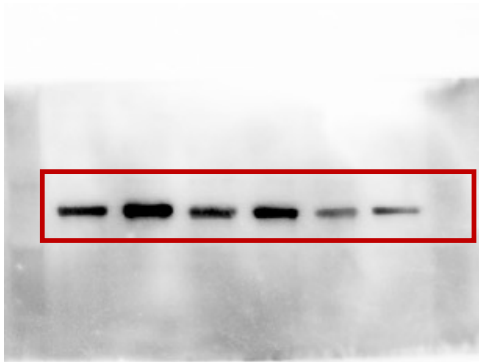

GAPDH

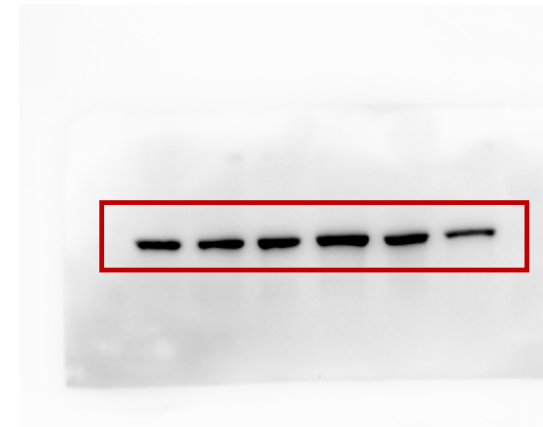

## Figure Supplementary 6 B

S100A9

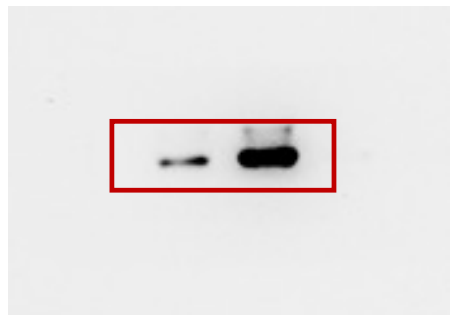

S100A9

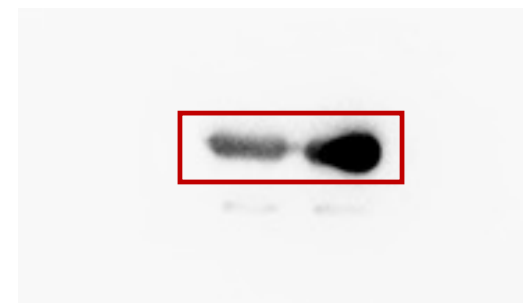

$\beta$ -actin

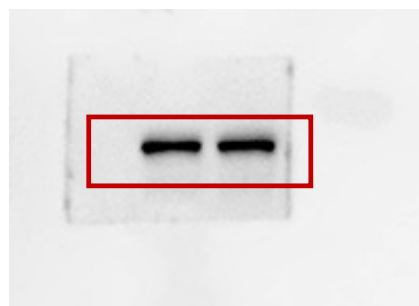

HSP70

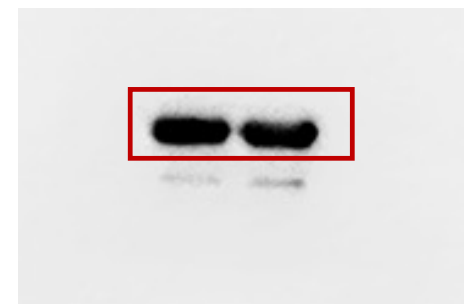

## Figure Supplementary 6 B

S100A9

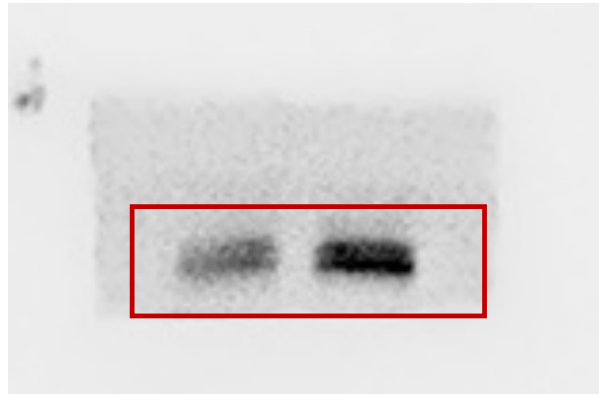

$\beta$ -actin

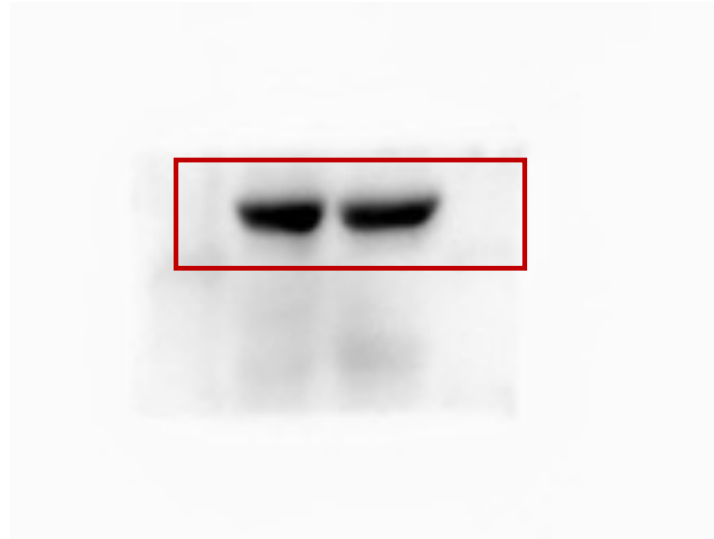



## Figure Supplementary 6 F

S100A9

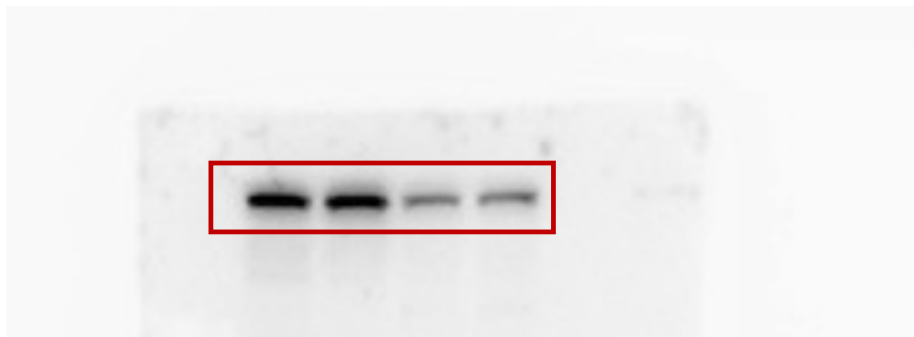

$\beta$ -actin

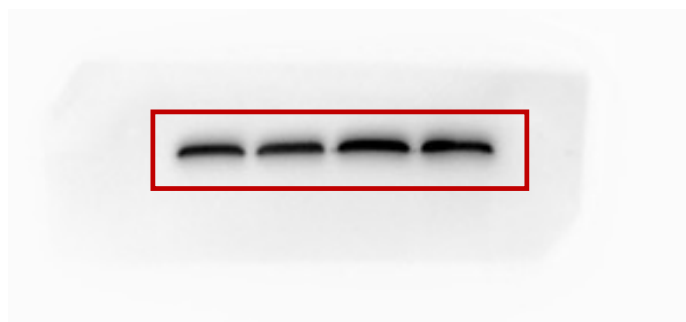

Supplement: Supplementary file 1 [file 1b525010c1382fa95fe81114.pdf]
