# Supplementary material for: Exosomal S100A9 Promotes Lung Metastasis of Adenoid Cystic Carcinoma via Activating Cancer-Associated Fibroblasts
Source: Research Square preprint supplement (doi:10.21203/rs.3.rs-7171055/v1), 2025-10-05
Supplement: Supplementary file 1 [file 0844f3316b56b3c5b867e9e2.xlsx]

## Sheet: Table 1
Table 1 Correlation between the clinicopathological variables and expression of S100A9 in patients with ACC.
Variables		S100A9 expression			P-value
		HIGH（%）	LOW（%）
Age（y）
＜48	26	14（53.8）	12（46.2）	0.134	0.714
≥48	30	14（46.7）	16（53.3）
Gender
Female	24	12（50）	12（50）	0	1
Male	32	16（50）	16（50）
Tumor size
＜4cm	41	19（46.3）	22（53.7）	0.445	0.505
≥4cm	15	9（60）	6（40）
Clinical stage
I/II	31	9（29）	18（58.1）	13.688	<0.001
III/IV	25	19（76）	6（24）
Site
Major salivary gland	28	12（42.9）	16（57.1）	1.333	0.249
Minor salivary gland	28	16（57.1）	12（42.9）
Lymph node metastasis
Absent	46	19（41.3）	27（58.7）	8	0.005
Present	10	9（90）	1（10）
Perineural invasion
Absent	14	6（42.9）	8（57.1）	0.371	0.542
Present	42	22（52.4）	20（47.6）
Lung metastasis
Absent	38	10（26.3）	28（73.7）	23.239	<0.001
Present	18	18（100）	0（0）
Local regional recurrence
Absent	43	18（41.9）	25（58.1）	4	0.045
Present	13	10（76.9）	3（23.1）
