# Supplementary material for: Exosomal S100A9 Promotes Lung Metastasis of Adenoid Cystic Carcinoma via Activating Cancer-Associated Fibroblasts
Source: Research Square preprint supplement (doi:10.21203/rs.3.rs-7171055/v1), 2025-10-05
Supplement: Supplementary file 2 [file 1c1f572710b593f3d84314c0.xlsx]

## Sheet: Sheet1
Supplementary Table 1 Sequences of siRNA
Product Code	Product Name	Sequence
stB0007755A	genOFFTM st-h-S100A9_001	TCAACACCTTCCACCAATA
stB0007755B	genOFFTM st-h-S100A9_002	AGCTGAGCTTCGAGGAGTT
stB0007755C	genOFFTM st-h-S100A9_003	CAAAGAGCTGGTGCGAAAA
