# Supplementary material for: Exosomal S100A9 Promotes Lung Metastasis of Adenoid Cystic Carcinoma via Activating Cancer-Associated Fibroblasts
Source: Research Square preprint supplement (doi:10.21203/rs.3.rs-7171055/v1), 2025-10-05
Supplement: Supplementary file 3 [file 43db718bf6bf44ff2bee0b62.xlsx]

## Sheet: Sheet1
Supplementary Table 2. The information of antibody used in this study.
Antibody	Company	Catalog	Nation/City	Dilution rate	application
anti-S100A9	Abcam	ab92507	Cambridge, UK	1:1000	WB
anti-E-cadherin	Proteintech	20874-1-AP	China	1:5000	WB
anti-N-cadherin	Proteintech	22018-1-AP	China	1:5000	WB
anti-CD63	Abcam	ab134045	Cambridge, UK	1:5000	WB
anti-CD9	Abcam	ab263019	Cambridge, UK	1:1000	WB
anti-CD81	Abcam	ab109201	Cambridge, UK	1:700	WB
anti-HSP70	Abcam	ab181606	Cambridge, UK	1:1000	WB
anti–TSG101	Abcam	ab125011	Cambridge, UK	1:1000	WB
anti–β-actin	Cell Signaling Technology	3700	USA	1:1000	WB
anti–GAPDH	Cell Signaling Technology	97166	USA	1:1000	WB
anti–Histone H3	Cell Signaling Technology	14269	USA	1:1000	WB
anti-FAP	Cell Signaling Technology	66562	USA	1:1000	WB
anti-α-SMA	Cell Signaling Technology	19245	USA	1:1000	WB
anti-MMP2	Abcam	ab92536	Cambridge, UK	1:1000	WB
anti-MMP9	Abcam	ab76003	Cambridge, UK	1:1000	WB
anti-Snail	Abcam	ab216347	Cambridge, UK	1:1000	WB
anti-Slug	Abcam	ab302780	Cambridge, UK	1:1000	WB
anti-p65	Cell Signaling Technology	8242	USA	1:1000	WB
anti-p-p65	Cell Signaling Technology	3033	USA	1:1000	WB
anti-S100A9	Abcam	ab92507	Cambridge, UK	1:1000	IHC
anti-FAP	Cell Signaling Technology	66562	USA	1:1000	IHC
anti-α-SMA	Cell Signaling Technology	19245	USA	1:1000	IHC
anti-Fibronectin	Proteintech	15613-1-AP	China	1:200	Immuno-fluorescence
anti-MMP9	Proteintech	10375-2-AP	China	1:400	Immuno-fluorescence
anti-VEGFR1	Proteintech	13687-1-AP	China	1:50	Immuno-fluorescence
anti-Pan-CK	ZSGB-Bio	ZM-0069	China	1:100	mIHC
anti-S100A9	Abcam	ab92507	Cambridge, UK	1:100	mIHC
anti-FAP	Cell Signaling Technology	66562	USA	1:70	mIHC
anti-CD63	Cell Signaling Technology	97778T	USA	1:200	mIHC
