# Supplementary material for: Exosomal S100A9 Promotes Lung Metastasis of Adenoid Cystic Carcinoma via Activating Cancer-Associated Fibroblasts
Source: Research Square preprint supplement (doi:10.21203/rs.3.rs-7171055/v1), 2025-10-05
Supplement: Supplementary file 4 [file 6baa23011d07482c5c723e69.xlsx]

## Sheet: Sheet1
Supplementary Table 4 Marker genes and references for annotated cell clusters
Range	Cluster	Cell type	Canonical markers	Literature
all cells	0, 9, 16	fibroblast	PDGFRA, FAP, DCN, COL3A1, ACTA2	Li R F et al. 2024; Cords L et al. 2023
	1, 3, 4, 8, 12, 14	epithelial cell	EPCAM, KRT19, KRT7, NOTCH1, MYB	Li R F et al. 2024; Gao R et al. 2014
	2	NK/T cell	PTPRC, CD3D, CD8A, NKG7	Quah H S et al. 2023; Li R F et al. 2024
	5, 6	myeloid cell	PTPRC, CD163, CD68	Li R F et al. 2024
	7, 11	B/Plasma cell	PTPRC, JCHAIN, CD79A	Li R F et al. 2024
	10	pericyte	RGS5, PDFGRB	Cords L et al. 2023
	13	endothelial cell	PECAM1, VWF	Li R F et al. 2024
	15	smooth muscle cell	DES, ACTA1	Muhl L et al. 2022
epithelial cells	0, 4, 9	EMT state epithelial cell	VIM, PDGFRA, ITGA2, CDH11	Li R F et al. 2024
	1	acinar epithelial cell	MUC5B, CTPS1, MUC7	Zhou M J et al. 2023; An P G et al. 2023; Li R F et al. 2024
	2, 7, 10, 11, 12	non-malignant epithelial cell	EPCAM	Li R F et al. 2024
	3	myoepithelial cell	TP63, MYL9	Li R F et al. 2024; Zhou M J et al. 2023
	5	nonspecific epithelial cell	EPCAM, MYB, NOTCH1	Li R F et al. 2024
	6	fibroblast-like epithelial cell	DCN, LUM	Li R F et al. 2024; Cords L et al. 2023
	8	proliferating epithelial cell	TOP2A, MKI67	Li R F et al. 2024; Zhou M J et al. 2023
	13, 14	mucous acinar epithelial cell	BMP6, ALCAM, MUC7, MUC5B	Zhou M J et al. 2023; An P G et al. 2023; Li R F et al. 2024
fibroblasts	0, 8	apCAFs	HLA-DRA, HLA-DRB1, CD74	Cords L et al. 2023
		(antigen-presenting CAFs)
	1, 2, 3, 5	mCAFs	POSTN, MMP11, COL10A1, COL11A1, COL8A1, COL1A2, COL12A1, COL3A1, COL5A2, COMP, ASPN	Cords L et al. 2023
		(matrix CAFs)
	4	iCAFs	APOD, CFD, C3, CD34, CXCL12, CXCL14, IL6	Cords L et al. 2023
		(inflammatory CAFs)
	6	nCAFs	PDGFRA, FAP, DCN
		(nonspecific CAFs)
	7	vCAFs	NOTCH3, COL18A1, MCAM, ACTA2, MYH11	Cords L et al. 2023
		(vascular CAFs)
