# Supplementary material for: Exosomal S100A9 Promotes Lung Metastasis of Adenoid Cystic Carcinoma via Activating Cancer-Associated Fibroblasts
Source: Research Square preprint supplement (doi:10.21203/rs.3.rs-7171055/v1), 2025-10-05
Supplement: Supplementary file 5 [file a6f9947e68bb32b378072dec.xlsx]

## Sheet: Sheet1
Supplementary Table 3 Sequences of Primer
Product name	Sequence
GAPDH-F	CGACAGTCAGCCGCATCTT
GAPDH-R	CCAATACGACCAAATCCGTTG
S100A9-F	GCACCCAGACACCCTGAACC
S100A9-R	GTGTCCAGGTCCTCCATGATGTG
actin-F	CATGTACGTTGCTATCCAGGC
actin-R	CTCCTTAATGTCACGCACGAT
IL-6-F	ACTCACCTCTTCAGAACGAATTG
IL-6-R	CCATCTTTGGAAGGTTCAGGTTG
IL-8-F	TTTTGCCAAGGAGTGCTAAAGA
IL-8-R	AACCCTCTGCACCCAGTTTTC
α-SMA-F	CCTGTGTTGTGGTTTACACTGG
α-SMA-R	GGGGGAATTATCTTTCCTGGTCC
MMP2-F	ATAACCTGGATGCCGTCGT
MMP2-R	AGGCACCCTTGAAGAAGTAGC
TNF-α-F	CCAGGCATCAGATCATCTTC
TNF-α-R	GGATGTTCGTCCTCCTCACAG
IL-1β-F	ATGATGGCTTATTACAGTGGCAA
IL-1β-R	GTCGGAGATTCGTAGCTGGA
MMP9-F	GAACCAATCTCACCGACAGG
MMP9-R	GCCACCCGAGTGTAACCATA
FAP-F	GAGCCAGGACTTCCTACAACG
FAP-R	TGCCATAGGACTTGTGGGTTT
