# Supplementary material for: Exosomal S100A9 Promotes Lung Metastasis of Adenoid Cystic Carcinoma via Activating Cancer-Associated Fibroblasts
Source: Research Square preprint supplement (doi:10.21203/rs.3.rs-7171055/v1), 2025-10-05
Supplement: Supplementary file 6 [file c50c692b5426b1a5bfcd7844.docx]

Supplementary figures

**Figure S. 1. Characteristics of cell-derived exosomes.** (A) Electron microscopy images of SACC-83-exo and SACC-LM-exo (Scale bar = 100 nm). (B) Nanoparticle tracking analysis (NTA) was used to determine the particle size and concentration of SACC-83-exo and SACC-LM-exo. (C) Western blot of indicated proteins in exosomes from SACC-83 and SACC-LM.

**Figure S. 2.** **ScRNA-seq profiling in ACC samples.** (A) UMAP visualizations of 16 cell clusters in ACC. (B) Dot plots show the differential expression of genes across the cell types. (C) Heatmap shows the top 5 marker genes among 14 epithelial cell clusters in ACC. (D) UMAP visualizations of malignant (light blue) and non-malignant (dark blue) epithelial cells. (E) Violin plots show the EMT scores of FAP across fibroblast clusters. (F) Heatmap shows the top 5 marker genes among 8 fibroblast clusters in ACC. (G) Violin plots show the expression levels of FAP across fibroblast clusters. (H) Violin plots show the expression levels of α-SMA across fibroblast clusters.

**Figure S. 3.** **ScRNA-seq profiling and cell-cell communication in ACC samples in GSE216852 (10×Genomics scRNA-seq was performed using primary cancerous tissues and matched adjacent normal tissues from the tongue root glands and three lung metastases originating from the epiglottis and matched adjacent normal lung tissues).** (A) UMAP visualizations of 8 cell clusters in ACC. (B) Dot plots show the differential expression of genes across the cell types. (C) UMAP visualizations of 13 cell clusters in ACC epithelial cells. (D) Heatmap shows the top 5 marker genes among 13 epithelial cell clusters in ACC. (E) Volcano plot showing differentially expressed genes for EMT epithelial cells and other epithelial cells. Statistical thresholds are denoted by dashed lines (|Log2FC| > 1.2, q < 0.05). (F) UMAP visualizations of 7 epithelial cell types in epithelial clusters. (G) UMAP visualizations of 10 cell clusters in ACC fibroblasts. (H) Dot plots show the differential expression of genes in the cells across the cell types. (I) UMAP visualizations of 5 fibroblast cell types. (J) Distribution of FAP and α-SMA expression in fibroblast clusters. (K) Cellcell interactions between each cell subgroup in tumor. The number represents the interaction strength.

**Figure S. 4.** Representative images of multiplex immunohistochemistry showing the expression of DAPI, Pan-CK, S100A9, FAP, CD68 in ACC; scale bar = 500  μm (leftmost), and 50  μm (for the three images on the right).

**Figure S. 5. Fibroblasts in ACC TME.** (A) CAFs and NFs comes from human ACC tissues and normal salivary gland tissues in the same patients. Scale bar = 300 nm. (B) Western blot analysis of α-SMA and FAP expression level between NFs and CAFs from three paired samples. (C) Exosomes were labeled with PKH67 (red) and the fibroblasts were stained with Alexa Fluor 488 (green). Scale bar = 10 μm.

**Figure S. 6. Transfection of ACC tumor cells and fibroblasts.** (A) and (B) The expression of S100A9 in SACC-83 and SACC-83-exo after the transfection of lentiviral HBLV-h-S100A9-3xflag-ZsGreen-PURO. (C) and (D) The expression of S100A9 in / cells. (E) and (F) The mRNA and protein expression of S100A9 in SACC-LM after transfection with control or S100A9 siRNA. Data are presented as the mean ± SD. P values were calculated using two-tailed Student’s t test for (A, C, E). **P < 0.01, ***P < 0.001.
